# Supplementary material
Source: PubMed Central journal article supplement (PMC2752887)
Supplement: NIHMS95728-supplement-supplemental.pdf [file NIHMS95728-supplement-supplemental.pdf]

## Functional Ecology

**Figure S1.** Peptide fingerprint mapping by QSTAR- tandem MS revealed strong homology to the storage hexamerin proteins of the blow fly *Calliphora vicina*. Peptides within the upper and lower *Sarcophaga crassipalpis* arylphorin/LSP-1 bands and the LSP-2 band that matched the *C. vicina* storage hexamerins with greater than a 95% Scaffold probability score are in bold and underlined.

### Upper Arylphorin/LSP-1 Band

>gi|2148169|gb|AAB58984.1| arylphorin/LSP-1 [*Calliphora vicina*]  
MKIAIVLLAIVGLAASASITDKKVKIADKDFLAKQKFLFEIVYRVEDPLMFEEWIKMGKSFTFDK  
ADYNHFDMYMDKFYEAYKYGAILPKGEFFYYAKNWEVFQRNVAFAARMHCNEGMFVYALTLAVIHR  
DDFHGLILPSIYEIFPQYFFNSK**FVYEA EKFDYDVWSKY**IMYEKEYKDILYKDYATFYKNHDNHH  
YYFFTKDFKTYQWWK**MMGLGEHWYSEDR**FMLRDNMDKYNKDSKYLEIFEGTKMFFMPVDYTRDIE  
FFNKESVLSYFTEDVGFNAYWYYLNMDYAFFLDGKTYGLNKDR**RGEYWLYNVR**QLLSRYMERLS  
HGFGEIPRFSFMYSIEYGYNPQLVYHNGVGFSYRKNYYEVESFGKFDYFYKVLDFNRMDEIITK  
**GVYVTYDGKT**IDLRKPESIEYIGSIMQGNVDTFDSYFFKYWYMF AHMYFGDDNTHDFEVPHIFL  
NYETMMRDPMFYMFYK KIASVYFQFFNYVKPYTHEELLFPGVTIKDKVSELVTYFDLVDVDFVTN  
LMNDK**MTFVDGQFVWDK**TLLARQMRLN HKPFDFDFVIESDKAQKV VIRT YLGPKYDEFGRV**ISLT**  
**ENRENFME LDSFLYTLK**SGVNEFKRYSKDFYWTVEDR**TTYTELYK**YVMLALQGK**YDFPLDISEPH**  
**CGFPDR**LVLPHGWYK GMPMQFFFYVTPFTTEYEQFSTYDYSYSCGIGSGVRY**IDEMPFGYPFDRE**  
IDEYEFFVPNMYFKDVKIFHQDTFEKYFEHKEYEKGHFDYNYHH

### Lower Arylphorin/LSP-1 Band

>gi|2148169|gb|AAB58984.1| arylphorin/LSP-1 [*Calliphora vicina*]  
MKIAIVLLAIVGLAASASITDKKVKIADKDFLAKQKFLFEIVYR**VEDPLMFEEWIKMGKSFTFDK**  
ADYNHFDMYMDKFYEAYKYGAILPKGEFFYYAKNWEVFQRNVAFAARMHCNEGMFVYALTLAVIHR  
DDFHGLILPSIYEIFPQYFFNSK**FVYEA EKFDYDVWSKY**IMYEKEYKDILYKDYATFYKNHDNHH  
YYFFTKDFKTYQWWK**MMGLGEHWYSEDR**FMLRDNMDKYNKDSKYLEIFEGTKMFFMPVDYTRDIE  
FFNKESVLSYFTEDVGFNAYWYYLNMDYAFFLDGKTYGLNKDR**RGEYWLYNVR**QLLSRYMERLS  
HGFGEIPRFSFMYSIEYGYNPQLVYHNGVGFSYRKNYYEVESFGKFDYFYKVLDFNRMDEIITK  
GVYVTYDGKTIDLRKPESIEYIGSIMQGNVDTFDSYFFKYWYMF AHMYFGDDNTHDFEVPHIFL  
NYETMMRDPMFYMFYK KIASVYFQFFNYVKPYTHEELLFPGVTIKDKVSELVTYFDLVDVDFVTN  
LMNDK**MTFVDGQFVWDK**TLLARQMRLN HKPFDFDFVIESDKAQKV VIRT YLGPKYDEFGRV**ISLT**  
**ENRENFME LDSFLYTLK**SGVNEFKRYSKDFYWTVEDR**TTYTELYK**YVMLALQGK**YDFPLDISEPH**  
**CGFPDR**LVLPHGWYK GMPMQFFFYVTPFTTEYEQFSTYDYSYSCGIGSGVRY**IDEMPFGYPFDRE**  
IDEYEFFVPNMYFKDVKIFHQDTFEKYFEHKEYEKGHFDYNYHH

### LSP-2 Band

>gi|1890114|gb|AAC24157.1| hexamerin LSP-2 [*Calliphora vicina*]  
MKSFI AVAVIALAFFALASSKHIESK**VADKDFLVK**QKFM LDILQH VYQDDV FVKKYDES YV TYKP  
WEHAEDYNEIDLKDF FELWQHDP IYDDEIFSPVYERHVEYAHYLTRLFYFAK**DWNSFTHAVYWA**  
**RTHVNKQLFI**YSLTVAS IHRDDLKGI VLP AIYEIQPWHFFDADTLELA EKFRMHGFHN VKKLDNL  
HNVV IKS NYS NVYGDVNYEHSLSYFLEDIGFN AFY YYYNLDYPHWANGPVGHELNKDRRGEFYLF  
LHWQLLSRYYLRLSVDLGEIPHFNIYQPYEHGYF SNLHYYKGV SF PDRDNHYNFYEDNYQYAK  
DIEYYGARLAQYVDTNDEYLVAVNKLGNMIQGNPDSVNFKKYGLDHL YREL VNEGRPYGK**YGE**  
**TLPAILMHYETSLR**DPLFYSIYK**DIVSYWR**LMATYPEYKPKDLEFPGVKIDSVHMPEGLTTYFE  
YFDADISNAVNVVPSSESSADALFKFGRNSQLHGQSFVIKARQLRLN HKPF EYTL DVTSEKSQK  
AIVKVF IGPKYDENGLIHLEDNYMNF FELDHVVDLAAGVNHLKRSSDDFTWYVSDR**TTYLELY**  
**QKVM**DATNSDYK FPLNQDEAHCGVPQRIMLPKGKKGMPFQFFYIVYPYHAPVQYQYSTYDPVIS  
CGIGSGSRFVDTLPFGFPFNR**HDYFNVDNIK**FYDIKIYHKDDHTNLV

**Hahn, James, Milne, & Hatle.** Life history plasticity after attaining a dietary threshold for reproduction is associated with protein storage in flesh flies.
